# Supplementary material for: Reliability of Paris Classification for superficial neoplastic gastric lesions improves with training and narrow band imaging
Source: PubMed Central journal article supplement — Endosc Int Open. 2019 May 2;7(5):E633–40. doi: 10.1055/a-0828-7541 (PMC6497497; doi:10.1055/a-0828-7541), 2019-05-02
Supplement: 1154supmat-10-1055-a-0828-7541.pdf [file 1154supmat-10-1055-a-0828-7541.pdf]

**Appendix 1** Presence of submucosal invasion of the lesions considering histology as the gold standard and classification attributed by each observer to each of the superficial gastric lesions.

| Lesions | Submucosal invasion | HR-WL image group |         |         |         |         |         |         |         | HR-WL+ HR-NBI image group |         |         |         |         |         |         |         |
|---------|---------------------|-------------------|---------|---------|---------|---------|---------|---------|---------|---------------------------|---------|---------|---------|---------|---------|---------|---------|
|         |                     | MDR               | DL      | PPN     | PB      | AF      | PBC     | RC      | TC      | MDR                       | DL      | PPN     | PB      | AF      | PBC     | RC      | TC      |
| 1       | No                  | Ila               | Ila+Ilb | Ila+Ilc | Ila+Ilc | Ila     | Ila+Ilb | Ila+Ilb | Ila+Ilc | Ila                       | Ila+Ilc | Ilb+Ila | Ila+Ilc | Ila     | Ilb+Ila | Ilb     | Ilb     |
| 2       | No                  | Is                | Ila     | Is      | Is      | Is      | Is      | Is      | Ila     | Is                        | Is      | Ila     | Is+Ila  | Ila     | Is      | Is      | Ila+Ilc |
| 3       | No                  | Is                | Ila     | Is                        | Ila     |
| 4       | No                  | Ila+Ilc           | Ila+Ilb | Ila+Ilc | Ila+Ilc | Ila     | Ila     | Ila+Ilc | Ila+Ilc | Ila                       | Ila     | Ila     | Ila+Ilc | Ila     | Ila     | Ila     | Ila     |
| 5       | No                  | Ilc+Ila           | Ila     | Ila     | Ila     | Ila     | Ila+Ilb | Ilb     | Ilb     | Ilb                       | Ila     | Ilb     | Ila     | Ilb     | Ilb     | Ilb     | Ilb     |
| 6       | No                  | Ilc               | Ila+Ilc | III     | Ilc+Ila | Ilc     | Ila+Ilc | III     | Ila+Ilc | Ilc+Ila                   | Ila+Ilc | Ila+Ilc | Ilc+Ila | Ila+Ilc | Ilc     | Ilc     | Ilc+Ila |
| 7       | No                  | Ila               | Ila     | Ila+Ilb | Ila     | Ila     | Ila+Ilb | Ilb     | Ila+Ilc | Ila                       | Ila+Ilb | Ila+Ilb | Ila     | Ila     | Ilb+Ila | Ilb     | Ila+Ilc |
| 8       | Yes                 | III               | Ilc+Ila | III                       | III     | III     | III     | III     | III     | III     | III+Ilc |
| 9       | Yes                 | Ilc+Ila           | Ila     | Ila+Ilc | Ilc+Ila | Ilc+Ila | Ilc+Ila | Ila+Ilb | Ila+Ilc | Ilc+Ila                   | Is      | Ilc+Ila | Ilc+Ila | Ila+Ilc | III     | Ila+Ilc | Ilc+Ila |
| 10      | Yes                 | Ila               | Ila+Ilc | Ila+Ilb | Ila     | Ila     | Ila     | Ila+Ilb | Ila+Ilc | Ila                       | Ila+Ilc | Ila     | Ila     | Ila     | Ila     | Ila+Ilc | Ilc+Ila |
| 11      | No                  | Ilc+Ila           | Ila+Ilb | Ila+Ilc | Ilc+Ila | Ila+Ilc | Ila     | Ilc+Ila | Ila+Ilc | Ilc+Ila                   | Ila+Ilc | Ilb+Ila | Ilc+Ila | Ila+Ilc | Ila     | Ilc+Ila | Ila+Ilb |
| 12      | Yes                 | Ila+Ilc           | Ila+Ilc | Ila+Ilc | Ila+Ilc | Ila+Ilc | Ilc+Ila | Ila+Ilc | Ila+Ilc | Ila+Ilc                   | Ila+Ilc | Ila+Ilc | Ila+Ilc | Ila+Ilc | Ila+Ilc | Ila+Ilc | Ila+Ilc |
| 13      | No                  | Ila               | Ila+Ilb | Ila     | Ila     | Ila     | Ila+Ilb | Ila+Ilb | Ila     | Ila                       | Ila     | Ila     | Ila     | Ila     | Ila     | Ilb     | Ilb     |
| 14      | No                  | Ila               | Ila     | Is      | Ila     | Ila     | Ila     | Ila     | Ila     | Is                        | Ila     |
| 15      | No                  | Ilc+Ila           | Ila+Ilc | Ila                       | Ila+Ilc | Ila+Ilc | Ila+Ilc | Ila     | Ila+Ilc | Is      | Ila+Ilc |
| 16      | No                  | Ila               | Ila     | Ila     | Ila     | Ila     | Ila+Ilb | Ila+Ilc | Ilb     | Ila                       | Ila+Ilc | Ila     | Ila+Ilc | Ila     | Ila+Ilc | Ila     | Ilc+Ila |
| 17      | Yes                 | Ilc               | Ila+Ilc | Ilc     | Ila+Ilc | Ilc     | Ilb     | Ilc     | Ilb     | Ila+Ilc                   | Ilc+Ila | Ila+Ilc | Ila+Ilc | Ila+Ilc | Ilc+Ila | Ila+Ilc | Ila+Ilc |
| 18      | No                  | Ila+Ilc           | Ilb+Ilc | Ilb     | Ilc+Ila | Ilc     | Ilb     | Ilb     | Ilb     | Ilc+Ila                   | Ilb     | Ilb     | Ilc+Ila | Ila     | Ila     | Ilc     | Ila+Ilb |
| 19      | No                  | Ila               | Ila+Ilb | Ila     | Ila+Ilc | Ila     | Ila     | Ila+Ilc | Ila+Ilc | Ila                       | Ila     | Ila     | Ila+Ilc | Ila     | Ila     | Ila+Ilc | Ila+Ilc |
| 20      | No                  | Ilc               | Ilc     | Ilc     | Ilc     | Ilc     | Ilc     | Ilc     | Ilb     | Ilc                       | Ilc     | Ilc     | Ilc     | Ilc     | Ilc     | Ilc     | Ilc+Ila |
| 21      | No                  | Ila+Ilc           | Ila+Ilc | Ila+Ilc | Ilc+Ila | Ila+Ilc | Ila+Ilc | Ila+Ilc | Ila+Ilc | Ila+Ilc                   | Ila+Ilc | Ila+Ilc | Ilc+Ila | Ila     | Is      | Ila+Ilc | Ila+Ilc |
| 22      | No                  | Ip                | Isp     | Isp     | Isp     | Is      | Is      | Isp     | Ip      | Isp                       | Is      | Is      | Isp     | Is      | Is      | Is      | Ip      |
| 23      | No                  | Ila               | Ila+Ilc | Ila+Ilb | Ilc+Ila | Ila+Ilc | Ila     | Ila+Ilb | Ila+Ilc | Ila+Ilc                   | Ila+Ilc | Ila+Ilc | Ilc+Ila | Ila+Ilc | Ila     | Ila+Ilc | Ilc+Ila |
| 24      | No                  | Ila               | Ila     | Ila     | Ila     | Ila     | Ila     | Ilb     | Ilb     | Ila                       | Ila+Ilb | Ila     | Ila     | Ila     | Ila     | Ilb     | Ila     |
| 25      | No                  | Ila               | Ila+Ilb | Ila+Ilb | Ila     | Ila     | Ila+Ilb | Ilb     | Ila+Ilb | Ila                       | Ila+Ilb | Ila     | Ila     | Ila     | Ila+Ilb | Ila     | Ila+Ilc |
| 26      | No                  | Ila               | Ila     | Ila     | Ila     | Ila     | Ila     | Ilb     | Ila     | Ila                       | Ila+Ilb | Ilb+Ila | Ila     | Ila     | Ilb     | Ilb     | Ilb     |
| 27      | No                  | Ilc+Ila           | Ilb     | Ila+Ilb | Ila     | Ilb     | Ilb     | Ilb     | Ilb     | Ilc                       | Ila     | Ila     | Ila     | Ila     | Ilb     | Ilb     | Ilb     |
| 28      | No                  | Ilc               | Ilc+Ila | Ilc+Ila | Ila+Ilc | Ila+Ilc | Ila+Ilc | Ila+Ilb | Ila+Ilc | Ilc                       | Ila+Ilc | Ila+Ilc | Ilc+Ila | Ila+Ilc | Ilc     | Ila+Ilc | Ila+Ilc |
| 29      | No                  | Ilb               | Ilb     | Ilb     | Ilb     | Ilb     | Ilb     | Ilb     | Ilb     | Ilb                       | Ilb     | Ila+Ilc | Ilb     | Ilb     | Ilb     | Ilb     | Ilb     |
| 30      | No                  | Isp+Ila           | Is      | Is      | Is+Ila  | Is      | Is      | Ila     | Is+Ila  | Ip+Is                     | Is      | Is      | Is+Ila  | Is      | Is      | Is      | Is+Ila  |
| 31      | No                  | III               | III     | III     | Ilc     | Ilc     | Ilb+Ilc | Ilb+Ilc | Ilc     | III                       | III     | III     | Ilc     | Ilc     | Ilc     | Ilc     | Ilc     |
| 32      | No                  | Ila+Ilc           | Is      | Ila+Ilc | Ila+Ilc | Ila+Ilc | Ila     | Ila+Ilc | Ila+Ilc | Ila+Ilc                   | Ila+Ilc | Is      | Ila+Ilc | Ila+Ilc | Ila+Ilc | Is      | Ila+Ilc |
| 33      | No                  | Ilc               | Ilc     | Ilb     | Ilc     | Ilc     | Ilc     | Ilb     | Ilc     | Ilb                       | Ilb     | Ilb     | Ilc     | Ilb     | Ilb     | Ilb     | Ilb     |
| 34      | No                  | Ila+Ilc           | Is      | Ila     | Ila+Ilc | Ila     | Ila     | Ila     | Ila     | Ila                       | Is      | Ila     | Ila+Ilc | Ila+Ilc | Ila     | Ila     | Ila+Ilb |
| 35      | No                  | Ila               | Ilc+Ila | Ila     | Ila+Ilc | Ila+Ilc | Ilb+Ila | Ila+Ilb | Ila+Ilc | Ilc+Ila                   | Ilc+Ila | Ila+Ilb | Ila     | Ila+Ilc | Ila     | Ila+Ilb | Ila+Ilc |
| 36      | No                  | Ila+Ilc           | Ila+Ilc | Ila+Ilc | Ila+Ilc | Ila     | Ila     | Ila+Ilb | Ila     | Ila+Ilb                   | Ila     | Ila     | Ila+Ilc | Ila     | Ila+Ilc | Ila+Ilc | Ila+Ilc |
| 37      | No                  | Ilc+Ila           | Ilc     | Ilc+Ila | Ilc+Ila | Ila+Ilc | Ilc+Ila | Ilc+Ila | Ila+Ilc | Ilc                       | Ilc+Ila | Ila+Ilb | Ilc+Ila | Ila+Ilc | Ila+Ilc | Ilc     | Ila+Ilc |
| 38      | No                  | Ilc+Ila           | Ilc     | Ilb     | Ilc+Ila | Ilc     | Ila     | Ilb     | Ilc     | Ila+Ilc                   | Ila+Ilc | Ilb     | Ila+Ilc | Ila+Ilc | Ilb     | Ilb     | Ilb     |
| 39      | No                  | Ilc+Ila           | Ilc+Ila | Ila+Ilc | Ilc+Ila | Ila+Ilc | Ila+Ilc | Ila+Ilc | Ila+Ilc | Ila+Ilc                   | Ilc+III | Ila+Ilc | Ila+Ilc | Ila+Ilc | Ila+Ilc | Ila+Ilc | Ila+Ilc |
| 40      | No                  | Ila               | Ila+Ilc | Ila+Ilc | Ilc+Ila | Ila     | Ila     | Ilb+Ila | Ila+Ilb | Ila                       | Ila+Ilc | Ila     | Ilc+Ila | Ila     | Ila+Ilb | Ila     | Ilb     |
| 41      | Yes                 | Isp               | Isp     | Is      | Is      | Is      | Is      | Is      | Is      | Isp                       | Is      |
| 42      | Yes                 | Ila+Ilc           | Ilc+Ila | Ila+Ilc | Ilc+Ila | Ila     | Ila+Ilb | Ila+Ilc | Ila+Ilc | Ila+Ilc                   | Ilc+Ila | Ila+Ilc | Ila+Ilc | Ila+Ilc | Ila+Ilb | Ila+Ilc | Ila+Ilc |
| 43      | No                  | Ila+Ilb           | Ila     | Ilb     | Ilb     | Ilb     | Ilb     | Ilb     | Ilb     | Ila                       | Ilb     | Ilb     | Ila+Ilc | Ilb     | Ilb     | Ilb     | Ilb     |
| 44      | No                  | Ila+Ilc           | Ilb     | Ilb     | Ilc+Ila | Ila     | Ila     | Ilb     | Ilb     | Ila+Ilc                   | Ilb     | Ila+Ilc | Ila+Ilc | Ilc     | Ilb     | Ilc     | Ilb     |
| 45      | No                  | Ilc+Ila           | Ila+Ilc | Ila+Ilc | Ilc+Ila | Ila+Ilc | Ila+Ilc | Ila+Ilc | Ila+Ilc | Ilc+Ila                   | Ilc+Ila | Ila+Ilc | Ilc+Ila | Ila+Ilc | Ila     | Ila+Ilc | Ila+Ilc |
| 46      | No                  | Ila               | Ila     | Ila+Ilc | Ila+Ilc | Ila     | Is      | Ila+Ilb | Ila+Ilb | Ila+Ilc                   | Ila     | Ila     | Ila+Ilc | Ila     | Ila     | Ila     | Ila+Ilc |
| 47      | No                  | III               | Ilc     | Ila+Ilc | Ila     | Ila+Ilc | Ila     | Ilb+Ila | Ila+Ilb | Ilc                       | Ilb+Ila | Ila+Ilb | Ila     | Ila     | Ila     | Ila     | Ilb     |

|    |     |         |         |         |         |         |         |         |         |         |         |         |         |         |         |         |         |
|----|-----|---------|---------|---------|---------|---------|---------|---------|---------|---------|---------|---------|---------|---------|---------|---------|---------|
| 48 | No  | IIc+IIa | IIc+IIa | IIc+IIa | IIc+IIa | IIa+IIc | IIa     | IIb+IIa | IIa+IIc | IIc+IIa | IIa+IIc | IIa+IIc | IIc+IIa | IIa+IIc | IIa+IIc | IIa+IIc | IIa+IIb |
| 49 | No  | IIa     | IIa     | IIa     | IIa+IIc | IIa     | IIa     | IIa+IIc | III+IIc | IIa+IIc | IIa+IIc | IIa+IIc | IIa+IIc | IIa+IIc | IIa     | IIa+IIc | IIa+IIc |
| 50 | No  | IIa+IIc | IIc+IIa | IIc     | IIc+IIa | IIa+IIc | IIc     | IIa+IIc | IIa+IIc | IIc     | IIc     | IIc     | IIc+IIa | IIa+IIc | IIa+IIc | IIc     | IIc     |
| 51 | No  | IIa     | Is      | Is      | Is      | IIa     | IIa     | Is      | IIa     | IIa     |
| 52 | No  | IIb     | IIa     | IIb     | IIb     | IIb     |
| 53 | No  | IIc+III | IIa+IIc | IIa+IIc | IIc+IIa | IIa+IIc | IIc     | IIa+IIc | III     | IIa+IIc | IIa+IIb | IIa+IIc | IIa+IIc | IIa+IIc | IIc     | IIc     | IIa+IIc |
| 54 | Yes | IIc+IIa | III     | III     | IIc+IIa | IIc+IIa | IIc+III | IIc+III | IIc+III | IIc     | IIc     | IIc     | IIc+IIa | IIc     | IIc     | IIc     | IIc     |
